# Supplementary material for: Apathy and Depression Among People Aging With Traumatic Brain Injury: Relationships to Cognitive Performance and Psychosocial Functioning
Source: Atypon-hosted journal article supplement (doi:10.1176/appi.neuropsych.20230082), 2024-05-09
Supplement: appi.neuropsych.20230082.ds001.pdf [file appi.neuropsych.20230082.ds001.pdf]

**Table S1.** Descriptive statistics for cognitive<sup>1</sup> and psychosocial variables.

| <i>N</i> = 106                     | Mean [SD]    |
|------------------------------------|--------------|
| Episodic memory <sup>2</sup>       | -1.25 [1.03] |
| Processing speed <sup>3</sup>      | -.92 [1.07]  |
| Executive functioning <sup>4</sup> | -.57 [1.16]  |
| QOLIBRI                            | 67.4 [16.5]  |
| PART-O                             | 1.74 [.682]  |

SD = standard deviation. QOLIBRI = Quality of Life After Brain Injury questionnaire. PART-O = Participation Assessment with Recombined Tools-Objective. <sup>1</sup>Constituent test measures were age-normed according to their respective test publisher data prior to computation of the domain composites. Where test manuals provided only T-, scaled, or other standardized scores, these were converted to equivalent z-scores so that all cognitive measures were on the same metric.

Tests and measures included:

<sup>2</sup>: **Hopkins Verbal Learning Test-Revised (Delayed Recall)**

(Benedict RHB, Schretlen D, Groninger L, Brandt J. Hopkins Verbal Learning Test - Revised: Normative data and analysis of inter-form and test-retest reliability. *The Clinical Neuropsychologist*. 1998;12(1).)

**Repeatable Battery for the Assessment of Neuropsychological Status (Figure Recall)**

(Randolph C, Tierney MC, Mohr E, Chase TN. The Repeatable Battery for the Assessment of Neuropsychological Status (RBANS): preliminary clinical validity. *J Clin Exp Neuropsychol*. 1998;20(3):310-319. doi:10.1076/jcen.20.3.310.823).

<sup>3</sup>: **Wechsler Adult Intelligence Scale-IV Processing Speed Index (Coding and Symbol Search subtest total scores)**

(Wechsler D. *Wechsler Adult Intelligence Scale - Fourth Edition*. The Psychological Corporation; 2008.)

4: **Delis-Kaplan Executive Function System Color-Word Interference (Interference Total Score) and Verbal Fluency (Letter Fluency Total Score)**

(Delis DC, Kaplan E, Kramer JH. *Delis-Kaplan Executive Function System*. The Psychological Corporation; 2001.)
